# Supplementary material
Source: PubMed Central journal article supplement (PMC3666764)
Supplement: JCM.02704-12_zjm999092383so1.pdf [file JCM.02704-12_zjm999092383so1.pdf]

Table S1

| strain         | species                               | RPA detection                          |                                        |                                    |
|----------------|---------------------------------------|----------------------------------------|----------------------------------------|------------------------------------|
|                |                                       | <i>B. anthracis</i><br>( <i>pagA</i> ) | <i>B. anthracis</i><br>( <i>capC</i> ) | <i>Y. pestis</i><br>( <i>pla</i> ) |
| 1. LVS         | <i>F. tularensis subs holarctica</i>  | -                                      | -                                      | -                                  |
| 2. FT 7        | <i>F. tularensis subs holarctica</i>  | -                                      | -                                      | -                                  |
| 3. FT 10       | <i>F. tularensis subs holarctica</i>  | -                                      | -                                      | -                                  |
| 4. B38         | <i>F. tularensis subs. tularensis</i> | -                                      | -                                      | -                                  |
| 5. DuBa-1      | <i>F. tularensis subs. tularensis</i> | -                                      | -                                      | -                                  |
| 6. FHSP        | <i>F. hispaniensis</i>                | -                                      | -                                      | -                                  |
| 7. FX 1        | <i>F. novicida</i>                    | -                                      | -                                      | -                                  |
| 8. FX 2        | <i>F. novicida</i>                    | -                                      | -                                      | -                                  |
| 9. U112        | <i>F. novicida</i>                    | -                                      | -                                      | -                                  |
| 10. CCUG4992   | <i>F. philomiragia</i>                | -                                      | -                                      | -                                  |
| 11. 03-1501    | <i>Y. pestis</i>                      | -                                      | -                                      | +                                  |
| 12. ATCC 55075 | <i>Y. enterocolitica</i>              | -                                      | -                                      | -                                  |
| 13. ATCC 9610  | <i>Y. enterocolitica</i>              | -                                      | -                                      | -                                  |
| 14. ATCC 29833 | <i>Y. pseudotuberculosis</i>          | -                                      | -                                      | -                                  |
| 15. 3007       | <i>B. anthracis</i>                   | +                                      | +                                      | -                                  |
| 16. ATCC 12759 | <i>B. licheniformis</i>               | -                                      | -                                      | -                                  |
| 17. ATCC 6633  | <i>B. subtilis</i>                    | -                                      | -                                      | -                                  |
| 18. DSM 2046   | <i>B. thuringiensis</i>               | -                                      | -                                      | -                                  |
| 19. ATCC 14581 | <i>B. megaterium</i>                  | -                                      | -                                      | -                                  |
| 20. DSM 299    | <i>B. mycoides</i>                    | -                                      | -                                      | -                                  |
| 21. ATCC 31325 | <i>B. polymyxa</i>                    | -                                      | -                                      | -                                  |
| 22. ATCC 53522 | <i>B. cereus</i>                      | -                                      | -                                      | -                                  |
| 23. DSM 9378   | <i>B. cereus</i>                      | -                                      | -                                      | -                                  |
| 24. DSM 6127   | <i>B. cereus</i>                      | -                                      | -                                      | -                                  |
| 25. DSM 31     | <i>B. cereus</i>                      | -                                      | -                                      | -                                  |
| 26. DSM 345    | <i>B. cereus</i>                      | -                                      | -                                      | -                                  |
| 27. DSM 487    | <i>B. cereus</i>                      | -                                      | -                                      | -                                  |
| 28. DSM 609    | <i>B. cereus</i>                      | -                                      | -                                      | -                                  |
| 29. DSM 626    | <i>B. cereus</i>                      | -                                      | -                                      | -                                  |
| 30. DSM 4490   | <i>B. cereus</i>                      | -                                      | -                                      | -                                  |
| 31. DSM 6791   | <i>B. cereus</i>                      | -                                      | -                                      | -                                  |

Genomic DNA of strains 1-4, 6-10 were provided by the laboratory from Spain, strain 5, 11 and 15 were provided by the Institute for Microbiology of the German Armed Forces. All other strains were provided by the Institute of Bacterial Infections and Zoonoses of the Federal Research Center for Animal Health (FLI). DNA concentrations of the DNA preparations ranged from 114,47 ng/μl – 563,59ng/μl.
